# Supplementary material for: Eutrophication and Dreissena Invasion as Drivers of Biodiversity: A Century of Change in the Mollusc Community of Oneida Lake
Source: PubMed Central journal article supplement (PMC4092058; doi:10.1371/journal.pone.0101388), 2014-07-10
Supplement: pone.0101388.s001.pdf [file pone.0101388.s001.pdf]

**Table S1.** Mollusc species reported from Oneida Lake. Presence-absence (+/-), density ( $\text{m}^{-2}$   $\pm$  standard error, where available), and biomass ( $\text{mg m}^{-2}$   $\pm$  standard error, lakewide 2012 only) data given for Lower South Bay (LSB) and lakewide.

|                                               | <u>1915-17</u> [22, 23] |               | <u>1967-68</u> [24] |               | <u>1992-95</u> [25, 72] |               | <u>2012</u>      |                     |                     |
|-----------------------------------------------|-------------------------|---------------|---------------------|---------------|-------------------------|---------------|------------------|---------------------|---------------------|
|                                               | LSB<br>(1917)           | Lake-<br>wide | LSB<br>(1967)       | Lake-<br>wide | LSB<br>(1992)           | Lake-<br>wide | LSB              | Lakewide<br>Density | Lakewide<br>Biomass |
| <b>Gastropods:</b>                            |                         |               |                     |               |                         |               |                  |                     |                     |
| <i>Acella haldemani</i> <sup>3,4</sup>        | 0.3 $\pm$ 0.3           | +             | -                   | +             | -                       | -             | -                | -                   | -                   |
| <i>Amnicola limosus</i>                       | 171.5 $\pm$ 26.0        | +             | -                   | +             | -                       | +             | 150.3 $\pm$ 34.4 | 101.8 $\pm$ 27.1    | 781 $\pm$ 172       |
| <i>Amnicola pupoideus</i>                     | -                       | -             | -                   | -             | -                       | -             | 1.6 $\pm$ 1.2    | 1.6 $\pm$ 1.0       | 11 $\pm$ 7          |
| <i>Bithynia tentaculata</i> <sup>1</sup>      | 8.3 $\pm$ 4.3           | +             | 435.0               | +             | +                       | +             | 8.4 $\pm$ 3.7    | 77.2 $\pm$ 15.5     | 2251 $\pm$ 640      |
| <i>Campeloma decisum</i> <sup>3</sup>         | 4.5 $\pm$ 2.0           | +             | -                   | +             | -                       | -             | -                | -                   | -                   |
| <i>Cipangopaludina chinensis</i> <sup>1</sup> | -                       | -             | -                   | -             | -                       | -             | -                | +                   | +                   |
| <i>Elimia livescens</i>                       | 5.7 $\pm$ 2.2           | +             | 2.0                 | +             | +                       | +             | 2.1 $\pm$ 1.4    | 2.8 $\pm$ 1.7       | 132 $\pm$ 59        |
| <i>Elimia virginica</i> <sup>2</sup>          | -                       | -             | 1.0                 | +             | -                       | -             | 3.8 $\pm$ 1.8    | 1.0 $\pm$ 0.3       | 310 $\pm$ 125       |
| <i>Ferrissia parallela</i>                    | 6.0 $\pm$ 2.2           | +             | -                   | +             | +                       | +             | 5.2 $\pm$ 2.9    | 1.7 $\pm$ 0.5       | 6 $\pm$ 2           |
| <i>Ferrissia rivularis</i> <sup>3</sup>       | -                       | +             | -                   | +             | -                       | -             | -                | -                   | -                   |
| <i>Fossaria obrussa</i>                       | 0.3 $\pm$ 0.3           | +             | -                   | +             | +                       | +             | 1.6 $\pm$ 1.2    | 3.2 $\pm$ 1.2       | 22 $\pm$ 8          |
| <i>Gyraulus crista</i>                        | -                       | -             | -                   | -             | -                       | -             | 0.5 $\pm$ 0.5    | 0.2 $\pm$ 0.2       | 2 $\pm$ 2           |
| <i>Gyraulus circumstriatus</i>                | -                       | -             | -                   | -             | -                       | -             | 7.6 $\pm$ 4.9    | 0.8 $\pm$ 0.5       | 4 $\pm$ 3           |
| <i>Gyraulus deflectus</i>                     | 8.1 $\pm$ 2.5           | +             | 1.0                 | +             | +                       | +             | 53.6 $\pm$ 25.3  | 16.6 $\pm$ 3.0      | 55 $\pm$ 10         |
| <i>Gyraulus parvus</i>                        | 97.7 $\pm$ 18.1         | +             | 5.0                 | +             | +                       | +             | 175.2 $\pm$ 60.8 | 136.5 $\pm$ 60.6    | 228 $\pm$ 38        |
| <i>Helisoma anceps</i>                        | 10.8 $\pm$ 4.0          | +             | 1.0                 | +             | +                       | +             | 3.1 $\pm$ 1.6    | 3.0 $\pm$ 1.9       | 10 $\pm$ 7          |
| <i>Laevapex fuscus</i>                        | 0.6 $\pm$ 0.5           | +             | -                   | +             | +                       | +             | 7.1 $\pm$ 3      | 1.7 $\pm$ 0.6       | 11 $\pm$ 4          |
| <i>Lymnaea stagnalis</i> <sup>3,4</sup>       | -                       | +             | -                   | -             | -                       | -             | -                | -                   | -                   |
| <i>Physella spp.</i>                          | 58.0 $\pm$ 15.8         | n.a.          | 13.0                | n.a.          | n.a.                    | n.a.          | 111.8 $\pm$ 37.2 | 100.1 $\pm$ 41.8    | 518 $\pm$ 94        |
| <i>Physella ancillaria</i>                    | +                       | +             | +                   | +             | -                       | -             | +                | +                   | +                   |
| <i>Physella gyrina</i>                        | -                       | +             | -                   | +             | -                       | -             | -                | -                   | -                   |
| <i>Physella heterostropha</i>                 | -                       | -             | -                   | +             | -                       | -             | +                | +                   | +                   |
| <i>Physella integra</i>                       | +                       | +             | -                   | +             | +                       | +             | +                | +                   | +                   |
| <i>Planorbella campanulata</i>                | 7.2 $\pm$ 1.9           | +             | -                   | +             | -                       | +             | -                | -                   | -                   |
| <i>Planorbella trivolvis</i>                  | 5.1 $\pm$ 2.7           | +             | -                   | +             | +                       | +             | 20.6 $\pm$ 8.8   | 12.8 $\pm$ 2.2      | 394 $\pm$ 56        |

|                                              |            |        |        |        |        |        |           |            |          |
|----------------------------------------------|------------|--------|--------|--------|--------|--------|-----------|------------|----------|
| <i>Pleurocera acuta</i> <sup>2</sup>         | -          | +      | -      | -      | -      | -      | -         | 0.6±0.2    | 331±135  |
| <i>Pomatiopsis cincinnatiensis</i>           | 2.4±1.5    | +      | 7.0    | +      | -      | +      | -         | 0.02±0.02  | 1±1      |
| <i>Probythinella emarginata</i> <sup>3</sup> | 0.2±0.1    | +      | -      | -      | -      | -      | -         | -          | -        |
| <i>Promenetus exacuus</i> <sup>2</sup>       | 12.9±3.1   | +      | -      | -      | -      | +      | 1.2±0.8   | 1.3±0.8    | 8±4      |
| <i>Pseudosuccinea columella</i> <sup>3</sup> | 1.0±0.9    | +      | -      | +      | -      | +      | -         | -          | -        |
| <i>Pyrgulopsis lustrica</i>                  | 285.6±80.4 | +      | 3.0    | +      | +      | +      | 18.2±7.5  | 2.8±0.8    | 29±11    |
| <i>Somatogyrus depressus</i> <sup>3,4</sup>  | 0.02±0.02  | +      | -      | -      | -      | -      | -         | -          | -        |
| <i>Stagnicola catascopium</i> <sup>2</sup>   | 86.8±18.2  | +      | -      | +      | -      | -      | 67.4±26.3 | 27.3±7.5   | 475±110  |
| <i>Stagnicola elodes</i>                     | -          | +      | -      | +      | +      | +      | -         | 0.1±0.1    | 8±5      |
| <i>Stagnicola emarginata</i> <sup>3</sup>    | -          | +      | -      | +      | -      | -      | -         | -          | -        |
| <i>Valvata lewisi</i> <sup>2</sup>           | -          | +      | -      | +      | -      | -      | 0.5±0.5   | 1.6±1.1    | 45±38    |
| <i>Valvata piscinalis</i> <sup>1</sup>       | -          | -      | -      | -      | -      | -      | 1.0±1.0   | 2.0±1.8    | 71±63    |
| <i>Valvata sincera</i>                       | 0.6±0.3    | +      | -      | +      | -      | +      | -         | 6.0±3.9    | 14±8     |
| <i>Valvata tricarinata</i>                   | 18.2±5.5   | +      | 4.0    | +      | -      | +      | 53.9±25.3 | 109.2±39.0 | 1152±441 |
| <i>Viviparus georgianus</i>                  | 0.01±0.01  | +      | -      | +      | +      | +      | +         | +          | +        |
| Total gastropod species:                     | 26 (1)     | 32 (1) | 10 (1) | 29 (1) | 13 (1) | 20 (1) | 23 (2)    | 29 (3)     |          |

**Bivalves:**

|                                           |            |   |      |      |      |      |              |              |               |
|-------------------------------------------|------------|---|------|------|------|------|--------------|--------------|---------------|
| <i>Dreissena polymorpha</i> <sup>1</sup>  | -          | - | -    | -    | +    | +    | 923.8±194.2  | 780.5±158.9  | 63278±12304   |
| <i>Dreissena r. bugensis</i> <sup>1</sup> | -          | - | -    | -    | -    | -    | 1462.8±500.7 | 1635.0±395.4 | 397662±112597 |
| <i>Actinonaias ligamentina</i>            | -          | + | n.a. | -    | -    | -    | -            | -            | -             |
| <i>Alasmidonta undulate</i>               | -          | + | n.a. | +    | -    | -    | -            | -            | -             |
| <i>Elliptio complanata</i>                | 15.0±3.6   | + | +    | +    | +    | +    | -            | -            | -             |
| <i>Lampsilis radiata</i>                  | 3.0±0.6    | + | n.a. | +    | +    | +    | -            | -            | -             |
| <i>Leptodea fragilis</i>                  | -          | - | n.a. | +    | -    | +    | -            | -            | -             |
| <i>Ligumia recta</i>                      | -          | - | n.a. | +    | -    | -    | -            | -            | -             |
| <i>Margaritifera margaritifera</i>        | -          | + | n.a. | +    | -    | -    | -            | -            | -             |
| <i>Pisidium</i> spp.                      | 284.7±97.7 | + | n.a. | n.a. | n.a. | n.a. | 16.0±4.5     | 41.3±13.3    | 202±58        |
| <i>Potamilus alatus</i>                   | -          | - | n.a. | +    | -    | +    | -            | -            | -             |
| <i>Pyganodon cataracta</i>                | 0.3±0.1    | + | n.a. | -    | -    | -    | -            | -            | -             |
| <i>Pyganodon grandis</i>                  | 0.4±0.2    | + | +    | +    | +    | +    | -            | -            | -             |
| <i>Strophitus undulatus</i>               | -          | + | n.a. | +    | -    | -    | -            | -            | -             |

|                        |               |               |               |               |               |               |               |               |
|------------------------|---------------|---------------|---------------|---------------|---------------|---------------|---------------|---------------|
| <i>Villosa iris</i>    | -             | +             | n.a.          | -             | -             | -             | -             | -             |
| Total bivalve species: | 4 (0)         | 9 (0)         | n.a.          | 9 (0)         | 4 (1)         | 6 (1)         | 2 (2)         | 2 (2)         |
| <b>Total species:</b>  | <b>30 (1)</b> | <b>41 (1)</b> | <b>10 (1)</b> | <b>38 (1)</b> | <b>17 (2)</b> | <b>26 (2)</b> | <b>26 (4)</b> | <b>31 (5)</b> |

Note: Density data for Lower South Bay is the mean density ( $m^{-2}$ ) of each species across all samples collected in each study; lakewide densities and biomass for 2012 represent averages weighted by substrate and depth. For quantitative studies, + indicates a species found in qualitative samples. n.a. indicates a species was not sampled (or not recorded) in study. Total species tallies exclude sphaeriids, and denote the number of exotic species in parentheses.

<sup>1</sup> - species exotic to the region; <sup>2</sup> - gastropod species extirpated during eutrophication which has recovered by 2012; <sup>3</sup> - gastropod species which has not recovered following eutrophication; <sup>4</sup> - species classified as threatened/endangered by Johnson et al. [26]
